# Supplementary material
Source: PubMed Central journal article supplement (PMC5818781)
Supplement: jamainternmed-177-651-s001.pdf [file jamainternmed-177-651-s001.pdf]

## Supplementary Online Content

Dayal A, O'Connor DM, Qadri U, Arora VM. Comparison of male vs female resident milestone evaluations by faculty during emergency medicine residency training. *JAMA Intern Med.* Published online March 6, 2017. doi:10.1001/jamainternmed.2016.9616

**eFigure.** Screenshot of the InstantEval App Displaying the Patient-Centered Communication Subcompetency, Taken on an Apple iPad Mini

This supplementary material has been provided by the authors to give readers additional information about their work.

**eFigure.** Screenshot of the InstantEval App Displaying the Patient-Centered Communication Subcompetency, Taken on an Apple iPad Mini

 Back

**Evaluation**

 Log Off

**Resident:** John Dorian

**Patient Centered Communication**

Demonstrates interpersonal and communication skills that result in the effective exchange of information and collaboration with patients and their families.

|                                                                                                                                                                                                                                                                                                                                                                                         |
|-----------------------------------------------------------------------------------------------------------------------------------------------------------------------------------------------------------------------------------------------------------------------------------------------------------------------------------------------------------------------------------------|
| <input type="radio"/> <b>Level 1</b> <ul style="list-style-type: none"><li>- Establishes rapport with and demonstrate empathy toward patients and their families</li><li>- Listens effectively to patients and their families</li></ul>                                                                                                                                                 |
| <input type="radio"/> <b>Level 1.5</b>                                                                                                                                                                                                                                                                                                                                                  |
| <input type="radio"/> <b>Level 2</b> <ul style="list-style-type: none"><li>- Elicits patients' reasons for seeking health care and expectations from the ED visit</li><li>- Negotiates and manages simple patient/family-related conflicts</li></ul>                                                                                                                                    |
| <input type="radio"/> <b>Level 2.5</b>                                                                                                                                                                                                                                                                                                                                                  |
| <input checked="" type="radio"/> <b>Level 3</b> <ul style="list-style-type: none"><li>- Manages the expectations of those who receive care in the ED and uses communication methods that minimize the potential for stress, conflict, and misunderstanding</li><li>- Effectively communicates with vulnerable populations, including both patients at risk and their families</li></ul> |
| <input type="radio"/> <b>Level 3.5</b>                                                                                                                                                                                                                                                                                                                                                  |
| <input type="radio"/> <b>Level 4</b> <ul style="list-style-type: none"><li>- Uses flexible communication strategies and adjusts them based on the clinical situation to resolve specific ED challenges, such as drug seeking behavior, delivering bad news, unexpected outcomes, medical errors, and high risk refusal-of-care patients</li></ul>                                       |
| <input type="radio"/> <b>Level 4.5</b>                                                                                                                                                                                                                                                                                                                                                  |
| <input type="radio"/> <b>Level 5</b> <ul style="list-style-type: none"><li>- Teaches communication and conflict management skills</li><li>- Participates in review and counsel of colleagues with communication deficiencies</li></ul>                                                                                                                                                  |

Comments

**Submit**
